# Supplementary material for: Comparative Profiling of Hot and Cold Brew Coffee Flavor Using Chromatographic and Sensory Approaches
Source: MDPI journal article supplement (doi:10.3390/foods11192968), 2022-09-22
Supplement: s1 [file s1]

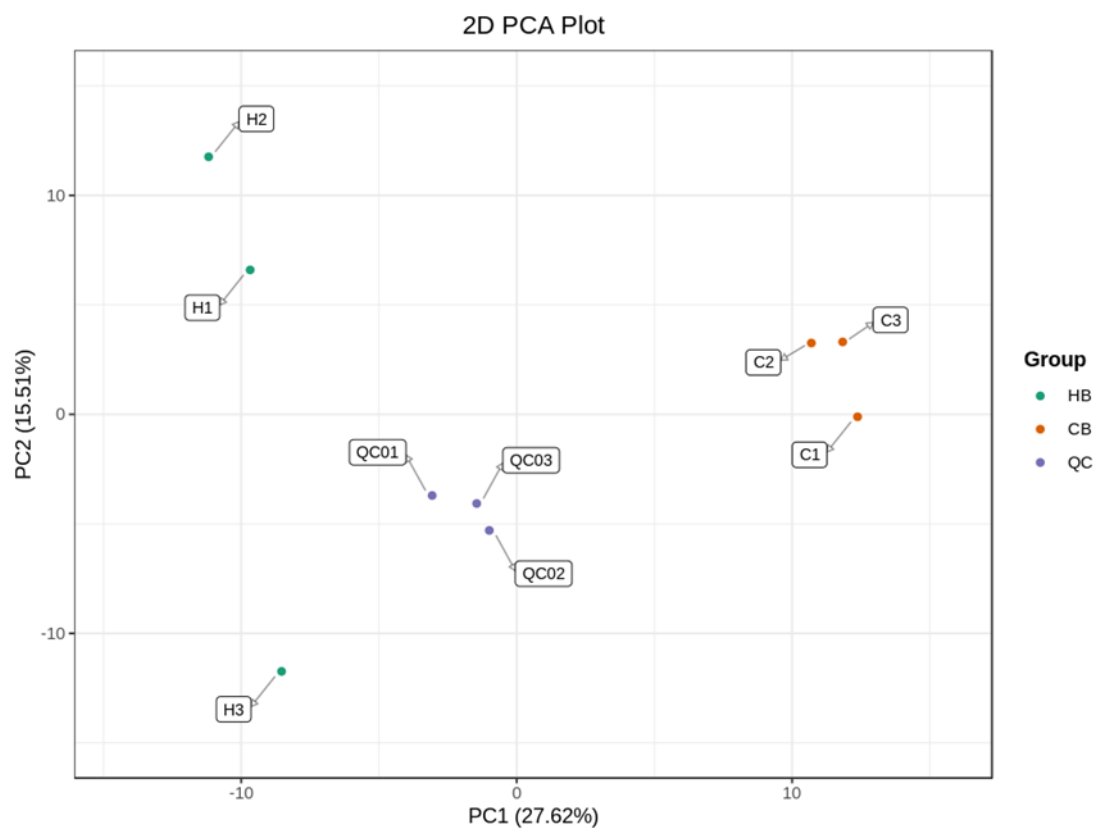

**Figure S1.** Principal component analysis (PCA) of the overall non-volatiles in hot and cold brew coffee using ultra-performance liquid chromatography-mass spectrometry/mass spectrometry (UPLC-MS/MS). HB: hot brew coffee; CB: cold brew coffee; QC: quality controls.

**Table S1.** Hot and cold brew coffee sensory attributes and their 5-point scale reference for panel training.

1  
2

| Term       | Definition                                                                                                                                  | Reference                       |
|------------|---------------------------------------------------------------------------------------------------------------------------------------------|---------------------------------|
| Color      | The visual perception of the coffee product                                                                                                 | Green tea =1, Coke =5           |
| Nutty      | The nonspecific nutlike flavors that are characteristic of several different nuts, for example, peanuts, hazelnuts, pecans, and almonds [5] | Roasted mixed nuts =5           |
| Coffee     | The perception of robust coffee flavor that is rounded with body [21]                                                                       | Italian blended coffee beans =5 |
| Fruity     | A sweet, floral aromatic blend of a variety of ripe fruits                                                                                  | Freshly cut lemon zest=5        |
| Sweet      | Fundamental taste sensation elicited by sugars                                                                                              | White granulated sugar =5       |
| Sour       | Fundamental taste sensation elicited by citric acid                                                                                         | Freshly cut lemon=5             |
| Bitter     | Fundamental taste sensation elicited by caffeine and quinine                                                                                | 100% dark chocolate =5          |
| Astringent | Chemical feeling factor on the tongue or oral cavity described as puckering or dry                                                          | Dry red wine=4                  |

3
